# Supplementary material for: Human Neuromuscular Junction on a Chip: Impact of Amniotic Fluid Stem Cell Extracellular Vesicles on Muscle Atrophy and NMJ Integrity
Source: MDPI journal article supplement (doi:10.3390/ijms24054944), 2023-03-03
Supplement: s1 [file s1]

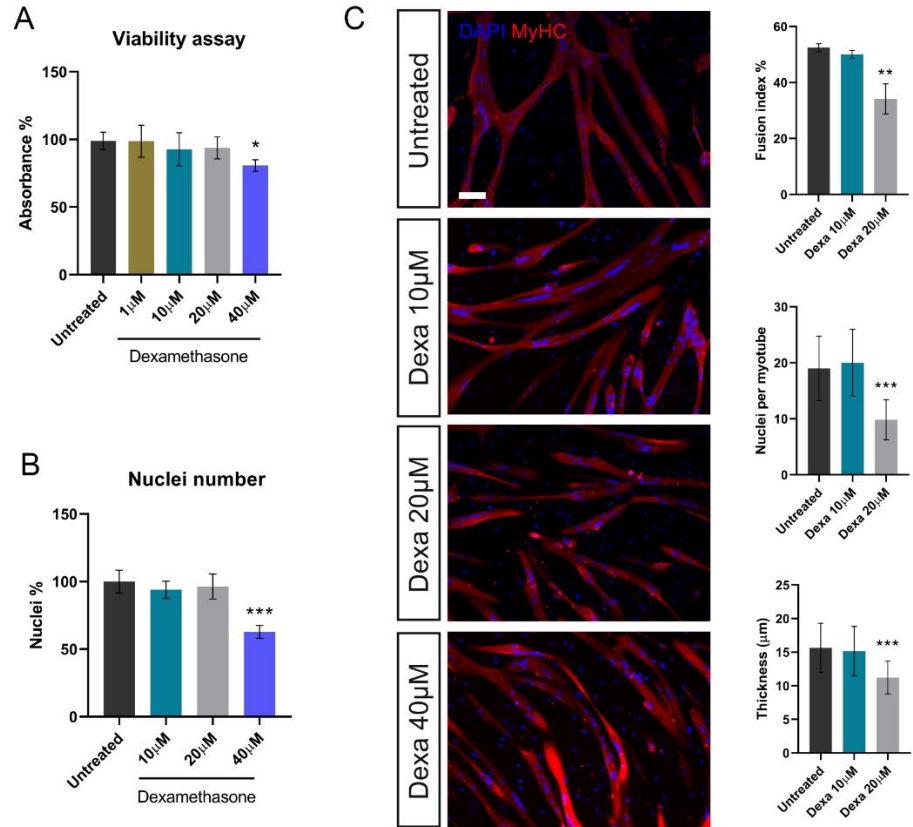

**Figure S1.** Dose dependent effects of Dexamethasone on hMAB-myotubes. **(A)** Graph of MTT assay of hMAB-myotubes exposed to 1, 10, 20, and 40  $\mu$ M Dexamethasone for 24 hours. Data shown are the mean  $\pm$  SD (n=5). \**p* value < 0.05. **(B)** Graph relative to the analysis of total nuclei number variations after 10, 20, and 40  $\mu$ M Dexamethasone exposure for 24 hours. Data shown are the mean  $\pm$  SD (biological replicates=3, fields each replicate =4). \*\*\**p* value < 0.001. **(C)** Representative images of hMAB-derived myotubes, treated or not with 10, 20, and 40  $\mu$ M Dexamethasone for 24 hours, stained with myosin heavy chain (MyHC) (red) and DAPI (blue) for nuclei. Scale bars: 50 $\mu$ m. Graphs relative to analysis of fusion index%, nuclei per myotube, and myotube thickness after Dexamethasone exposure (20 and 40  $\mu$ M for 24 hours). Data shown are the mean  $\pm$  SD (biological replicates=3, fields each replicate =4). \*\**p* value < 0.01, \*\*\**p* value < 0.001.

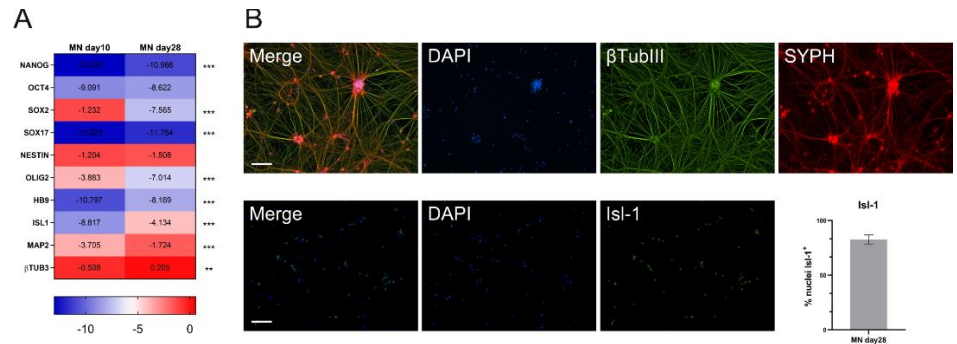

**Figure S2.** Differentiation of mature motor neurons derived from iPSCs. **(A)** Graph showing gene expression comparison between motor neurons at day 10 and 28 of differentiation for pluripotency, pan-neuronal, and motor neuron-specific markers. Data shown are the mean  $\pm$  SD (n=3). \*\* $p$  value < 0.01, \*\*\* $p$  value < 0.001 **(B)** Representative confocal images of MNs at day 28 of differentiation stained with  $\beta$ tubulinIII ( $\beta$ tubIII) (green), synaptophysin (SYPH) (red) – top –, and Islet-1 (Isl-1) (green) – bottom. Nuclei stained with DAPI. Scale bars: 75 $\mu$ m.

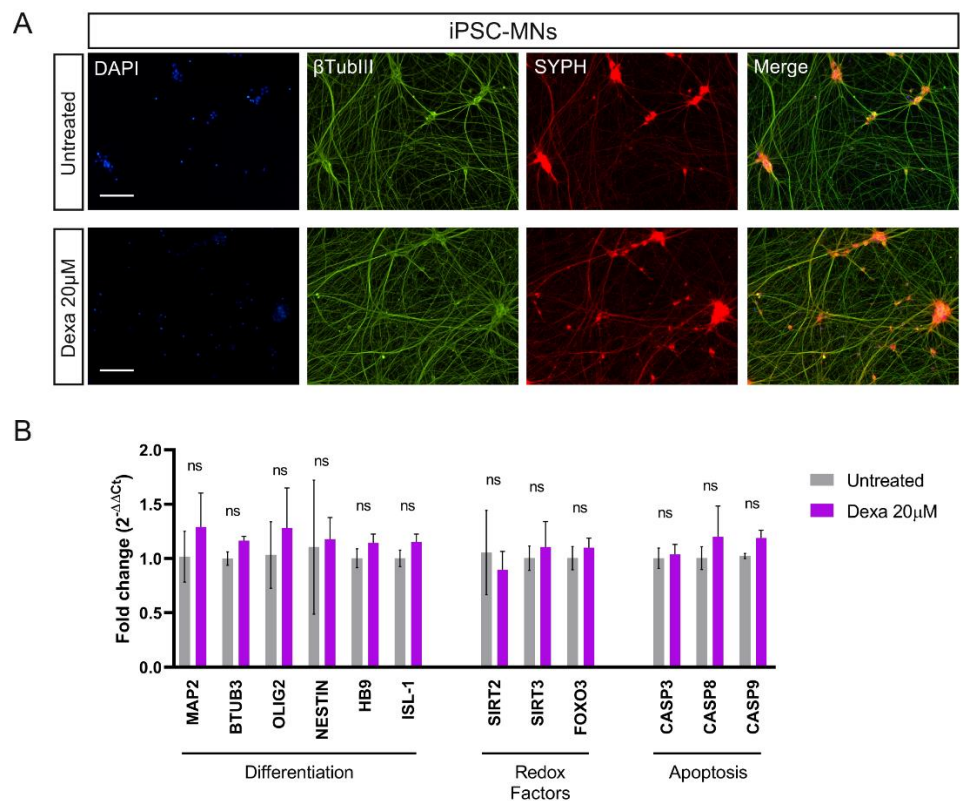

**Figure S3.** Dexamethasone effect on mature human iPSC-derived motor neurons. **(A)** Representative images of iPSC-derived motor neurons (iPSC-MNs) treated or not with 20  $\mu$ M Dexamethasone (24 h) stained with  $\beta$ tubulinIII ( $\beta$ tubIII) and synaptophysin (SYPH). Nuclei stained with DAPI. Scale bars: 75 $\mu$ m. **(B)** Graph showing gene expression comparison of neuronal differentiation, redox factor, and apoptosis markers of MNs treated or not with Dexamethasone. Data shown are the mean  $\pm$  SD (n=3).
